# Supplementary material for: Extending solid-phase methods in inorganic synthesis: the first dinuclear platinum complex synthesised via the solid phaseElectronic supplementary information (ESI) available: Definitions for abbreviations used, and synthesis of 1a, 1b, 4 and 7. See http://www.rsc.org/suppdata/cc/b2/b212388f/
Source: Royal Society of Chemistry journal article supplement (doi:10.1039/b212388f), 2003-02-07
Supplement: b212388f.pdf [file b212388f.pdf]

## Supplementary data

Definitions for Abbreviations used:

A2780: human ovarian carcinoma cell line  
A2780cisR: cisplatin-resistant human ovarian carcinoma cell line  
BOP: benzotriazol-1-yloxytris(dimethylamino)phosphonium  
DCM: dichloromethane  
DIPEA: *N,N*-diisopropylethylamine  
DMF: dimethylformamide  
ESI-MS: electrospray ionisation mass spectroscopy  
Fmoc: fluorenylmethoxycarbonyl protecting group  
MBHA: 4-methylbenzhydrylamine  
NMP: *N*-methyl-2-pyrrolidone  
NMR: nuclear magnetic resonance spectroscopy  
Rink amide linker: 4-(2',4'-Dimethoxyphenyl-Fmoc-aminomethyl)-phenoxy linker  
Rink amide MBHA resin: 4-(2',4'-Dimethoxyphenyl-Fmoc-aminomethyl)-phenoxyacetamido-norleucyl-MBHA resin (H. Rink, *Tetrahedron Lett.* 1987, **28**, 3787)  
SPPS: solid-phase peptide synthesis  
TEA: triethyl amine  
TFA: trifluoroacetic acid

### Synthesis of **1a**

To preswollen 2-chlorotrityl resin (0.05 mmol) was added, *N*- $\alpha,\epsilon$ -di-Fmoc-L-Lysine OH (0.1 mmol, 2 equiv) and DIPEA (0.2 mmol) in DCM. After 1.5 h the resin was washed (DCM/MeOH/DIPEA 17:2:1; DCM, DMF, DCM) to yield **1a**.

### Synthesis of **1b**

Fmoc protected Rink Amide MBHA resin was treated with 20% piperidine in DMF (2 x 20 min) after which the resin was washed (DMF, DCM). *N*- $\alpha,\epsilon$ -di-Fmoc-L-Lysine OH (0.2 mmol, 4 equiv), BOP (0.2 mmol) and DIPEA (0.4 mmol) in NMP (1 mL) was added and the reaction was shaken for 1 h. The resin was washed (NMP, DCM, NMP) to yield **1b**.

### Synthesis of **4**

Fmoc protected Rink Amide MBHA resin was treated with 20% piperidine in DMF (2 x 20 min) after which the resin was washed (DMF, DCM). (0.2 mmol, 4 equiv), BOP (0.2 mmol) and DIPEA (0.4 mmol) in NMP (1 mL) was added and the reaction was shaken for 1 h. The resin was washed (NMP, DCM, NMP). Removal of the Fmoc group was accomplished by treatment with 20% piperidine in DMF (2 x 20 min) after which the resin was washed (DMF, DCM). The subsequent *N*- $\alpha$  Fmoc-L-Glycine OH and *N*- $\alpha,\epsilon$ -di-Fmoc-L-Lysine OH were coupled under analogous conditions in a stepwise procedure to yield **4**.

### Synthesis of **7**

Treatment of **4** with 95% TFA in water and subsequent precipitation in diethyl ether gave **7** as a white powder. All non exchangeable protons assigned by <sup>1</sup>H NMR.
